# Supplementary material for: Fluorescent switching technology based on fluorescence resonance energy transfer for detecting dimethoate pesticides in environmental water
Source: Royal Society of Chemistry journal article supplement (doi:10.1039/c6ay02803a), 2016-01-01
Supplement: c6ay02803a1.pdf [file c6ay02803a1.pdf]

## Electronic Supplementary Information

### Fluorescent switching technology based on fluorescence resonance energy transfer for detecting dimethoate pesticide in environmental water

Zhen Sheng,<sup>a</sup> Jianfeng Zhang,<sup>b</sup> Chenyu Li,<sup>b</sup> Ligang Chen<sup>a\*</sup>

<sup>a</sup>Department of Chemistry, College of Science, Northeast Forestry University, 26 Hexing Road, Harbin 150040, China.

E-mail: [ligangchen2010@aliyun.com](mailto:ligangchen2010@aliyun.com) (L. Chen); Tel: +86-451-82190679-8244

<sup>b</sup>Center of Disease Control of Heilongjiang Province, 40 Youfang Street, Harbin 150030, China

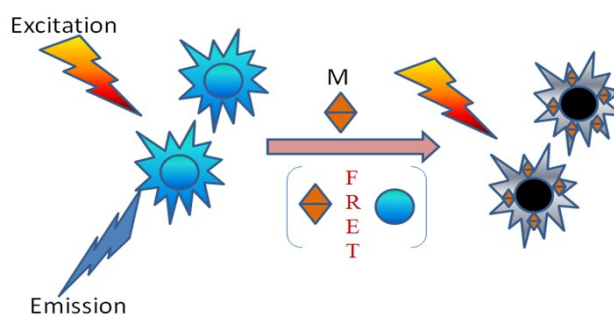

Fig. S1 The fluorescence resonance energy transfer mechanism

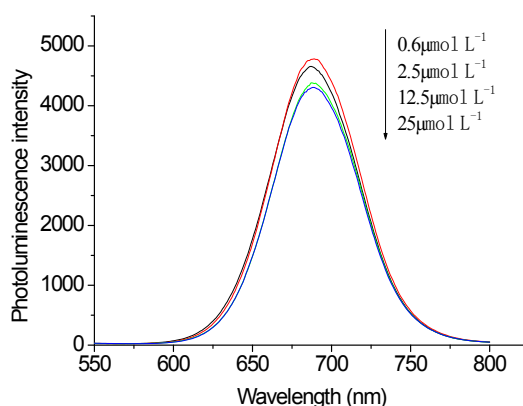

Fig. S2 Fluorescence spectra of the red QDs with the addition of different DZ concentration

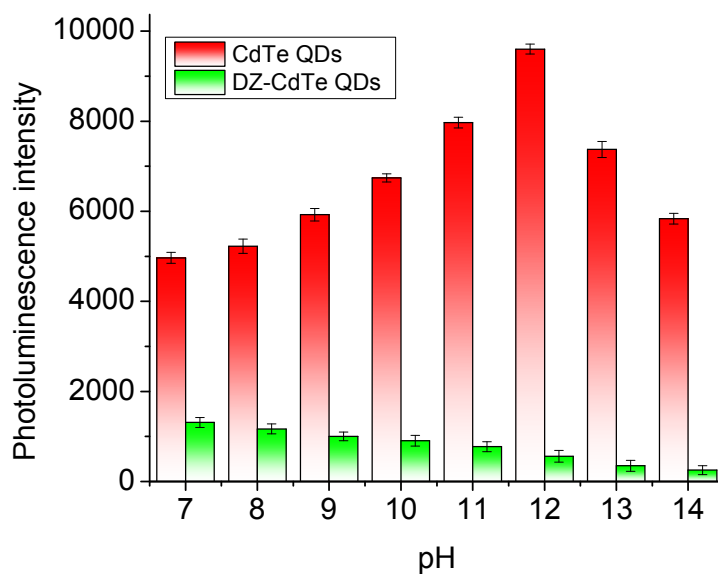

**Fig. S3** The influence of the pH on the intensity of fluorescence quantum dots and the fluorescence probe

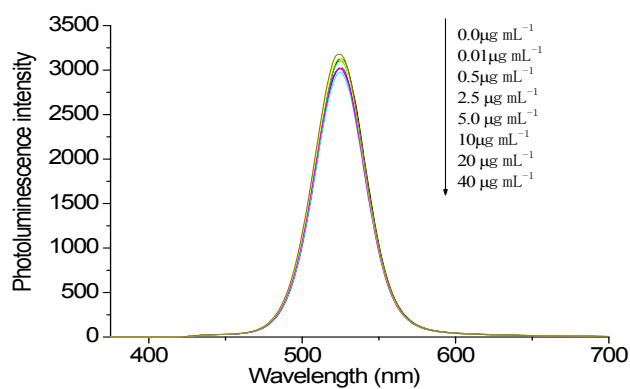

**Fig. S4** Fluorescence spectra of the CdTe QDs after addition of different concentrations of DMT

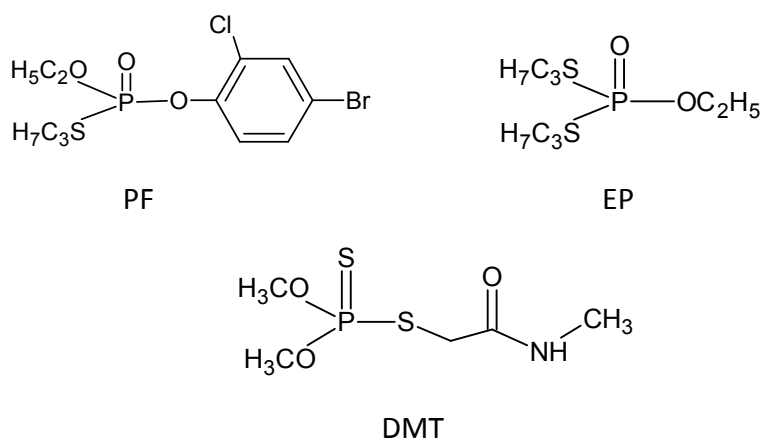

**Fig. S5** The structural formula about PF, EP and DMT

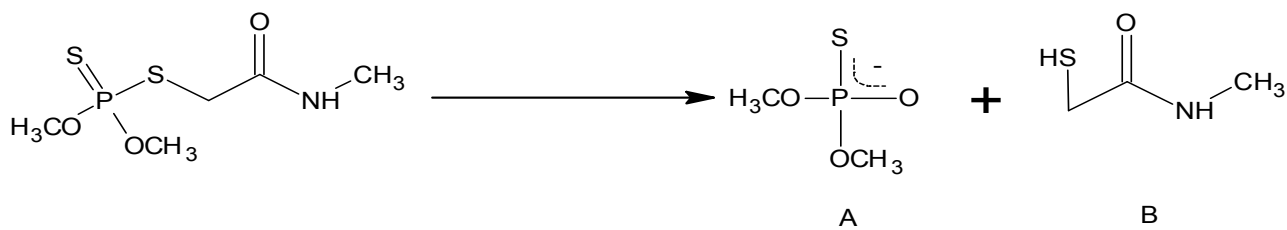

**Scheme S1** The hydrolysis of the DMT compounds

**Table S1** Recoveries of dimethoate from water (n=5)

| Sample      | Concentration sample<br>(this study)<br>( $\mu\text{g mL}^{-1}$ ) | Concentration sample<br>(GC-MS)<br>( $\mu\text{g mL}^{-1}$ ) | Concentration added<br>(this study)<br>( $\mu\text{g mL}^{-1}$ ) | Recovery<br>(this study)<br>(%) | RSD<br>(this study)<br>(%) |
|-------------|-------------------------------------------------------------------|--------------------------------------------------------------|------------------------------------------------------------------|---------------------------------|----------------------------|
| Tap water   | 0.00                                                              | 0.00                                                         | 0.30                                                             | 88.6                            | 5.5                        |
|             |                                                                   |                                                              | 3.00                                                             | 90.7                            | 3.2                        |
|             |                                                                   |                                                              | 30.00                                                            | 95.3                            | 3.8                        |
| River water | 0.60                                                              | 0.57                                                         | 0.50                                                             | 91.3                            | 3.7                        |
